# Supplementary material for: Synthesis of Li2CoSiO4 nanoparticles and structure observation by annular bright and dark field electron microscopy
Source: Royal Society of Chemistry journal article supplement (doi:10.1039/c3ra42540a), 2013-01-01
Supplement: c3ra42540a.pdf [file c3ra42540a.pdf]

## Supporting information

### Synthesis of $\text{Li}_2\text{CoSiO}_4$ nanoparticles and structure observation by annular bright and dark field electron microscopy

M. K. Devaraju\*, Q.D. Truong and I. Honma\*

*Institute of Multidisciplinary Research for Advanced Materials, Tohoku University,*

*2-1-1, Katahira, Aoba-ku, Sendai 980-8577, Japan*

\* [devarajumk@rediffmail.com](mailto:devarajumk@rediffmail.com); [i.honma@tagen.tohoku.ac.jp](mailto:i.honma@tagen.tohoku.ac.jp)

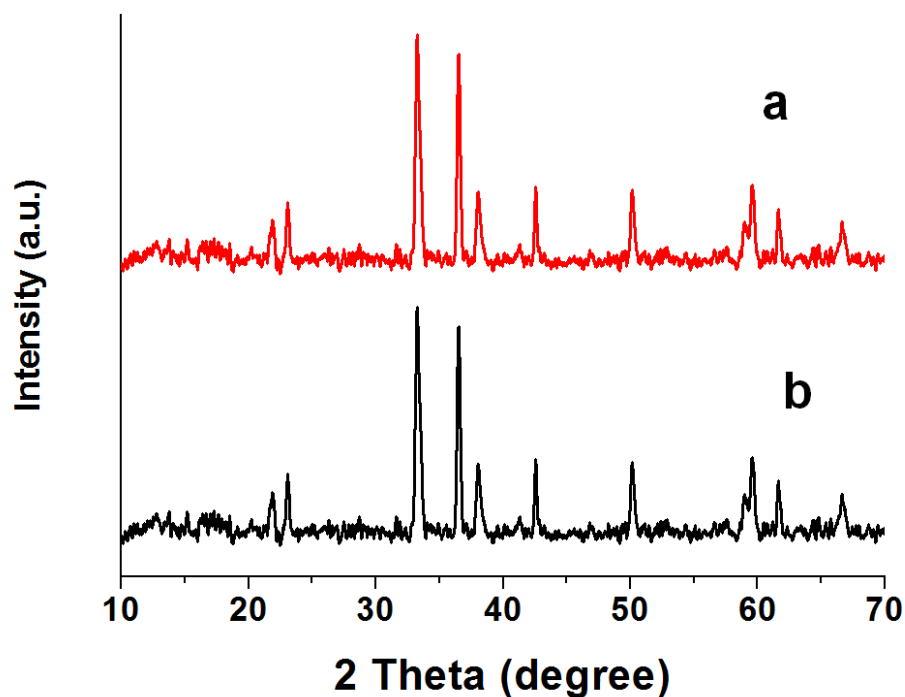

**Fig. S1** a) and b) XRD pattern of as-synthesized  $\text{Li}_2\text{CoSiO}_4$  particles at 300 °C and 350 °C for 10 min and 30 min, respectively.

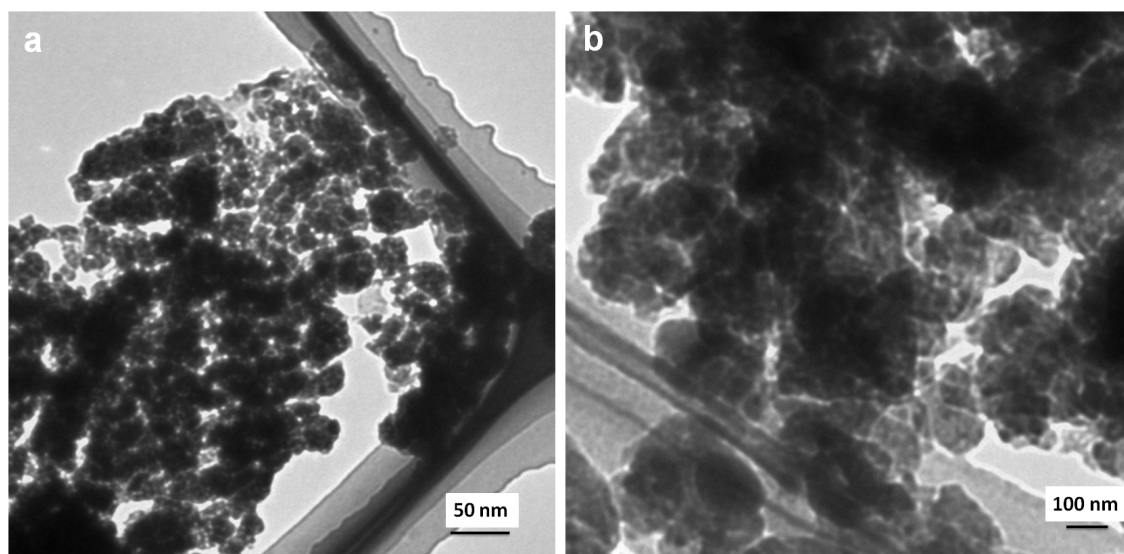

**Fig. S2** a) and b) TEM images of as-synthesized  $\text{Li}_2\text{CoSiO}_4$  particles at 300 °C and 350 °C for 10 min and 30 min, respectively.

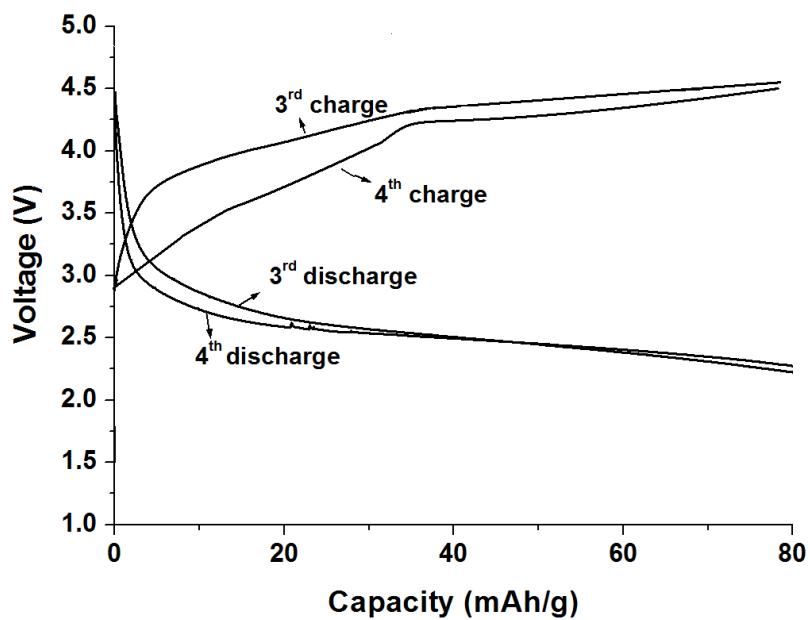

**Fig. S3.** Charge-discharge profile of  $\text{Li}_2\text{CoSiO}_4$  (3<sup>rd</sup> and 4<sup>th</sup> cycles).
